# Supplementary material for: AT2R agonist NP‐6A4 mitigates aortic stiffness and proteolytic activity in mouse model of aneurysm
Source: PubMed Central journal article supplement (PMC7339180; doi:10.1111/jcmm.15342), 2020-05-18
Supplement: JCMM-24-7393-s001.pdf [file JCMM-24-7393-s001.pdf]

**Supplemental Table 1: List of mouse primer sequences used for qRT-PCR studies**

| <b>Gene</b>  | <b>Forward Primer (5'-3')</b>   | <b>Reverse Primer (5'-3')</b>   |
|--------------|---------------------------------|---------------------------------|
| <i>Il6</i>   | CTA CCC CAA TTT CCA ATG CT      | ACC ACA GTG AGG AAT GTC CA      |
| <i>Mmp2</i>  | GAT GTC GCC CCT AAA ACA GA      | TGG TGT TCT GGT CAA GGT CA      |
| <i>Mmp9</i>  | AGA CCT GAA AAC CTC CAA CCT CAC | TGT TAT GAT GGT CCC ACT TGA GGC |
| <i>Il10</i>  | GCTCTTACTGACTGGCATGAG           | CGC AGC TCT AGG AGC ATG TG      |
| <i>Tnfa</i>  | CCC ACT CTG ACC CCT TTA CT      | TTT GAG TCC TTG ATG GTC GT      |
| <i>iNos</i>  | CTC GGA GGT TCA CCT CAC TGT     | TCC TGA TCC AAG TGC TGC AGA     |
| <i>At2r</i>  | ATG ATT GGC TTT TTG GAC CTGT    | AAG GGT AGA TGA CCG ATT GGT     |
| <i>At1ar</i> | GGA AAC AGC TTG GTG GTG AT      | ACA TAG GTG ATT GCC GAA GG      |
| <i>At1br</i> | TAC GCC AAG GAA TGA TGA CA      | GTC CAC TAC GTC CGC AAT TT      |

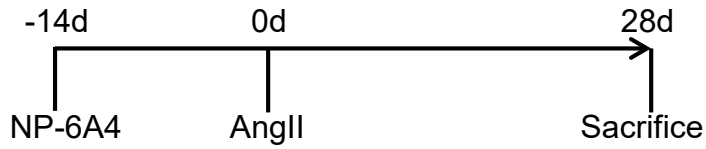

NP-6A4 (2.5 mg/kg/day) was given subcutaneously in *Apoe*<sup>-/-</sup> mice on alternate days starting 14 days before AngII infusion and continued for 28 days after AngII.

**Supplemental Figure 1.** Experimental strategy for *in vivo* studies.

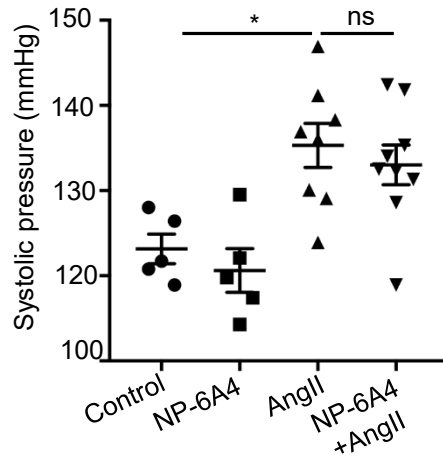

**Supplemental Figure 2.** NP-6A4 treatment did not affect the systolic arterial blood pressure significantly in *Apoe*<sup>-/-</sup> mice at baseline or in response to AngII.

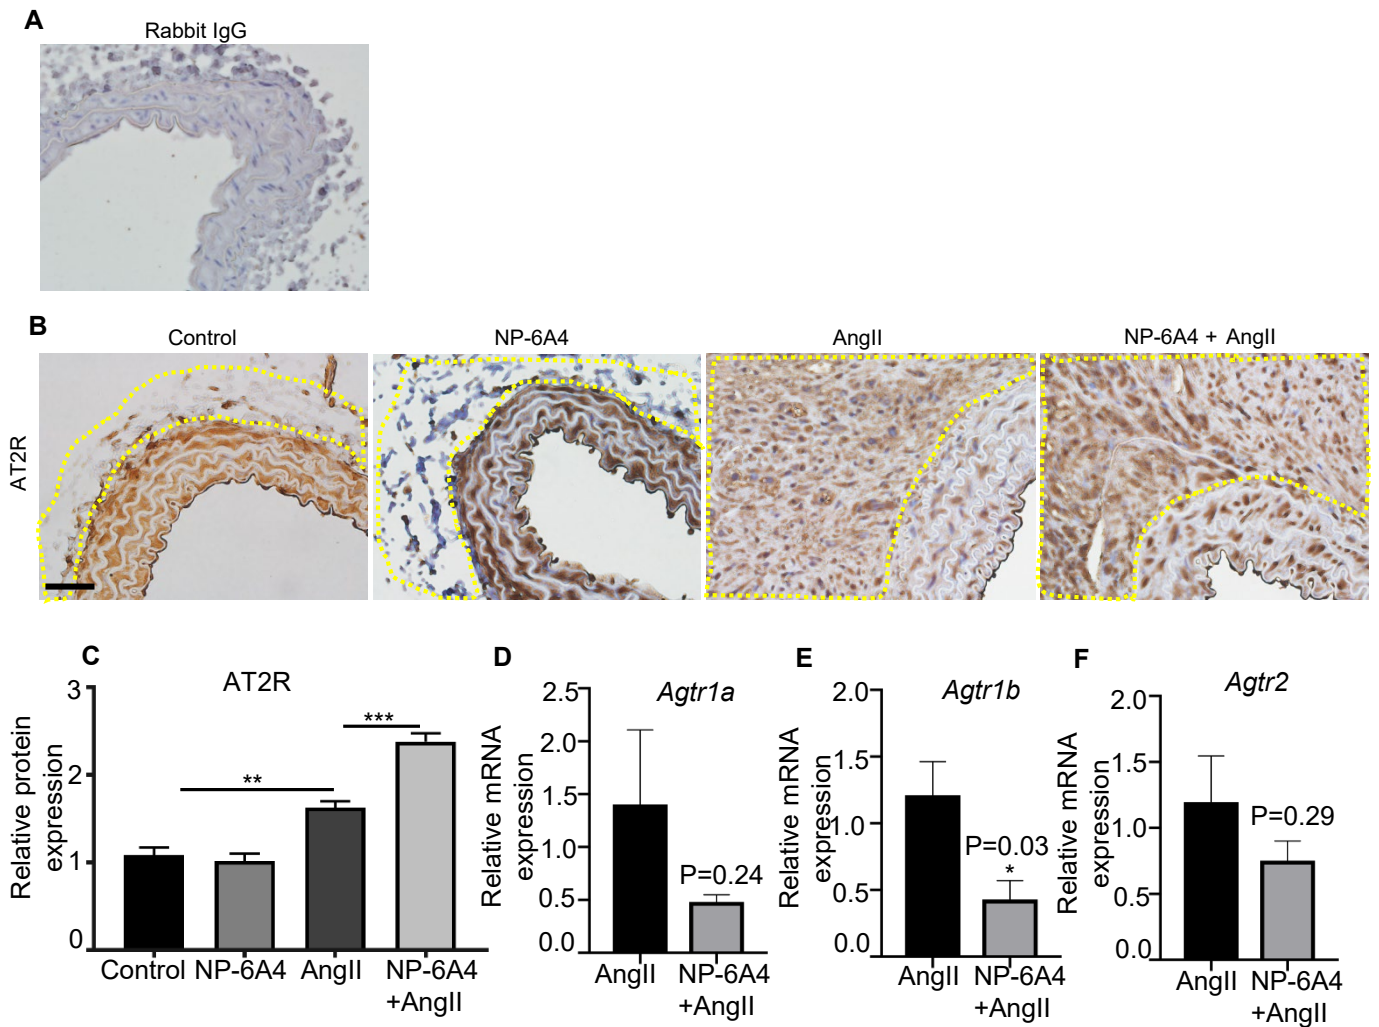

**Supplemental Figure 3.** Increase in AT2R protein ( encoded by *Agtr2* gene) expression in the adventitial region of aorta in response to NP-6A4 treatment and AngII infusion in the *Apoe*<sup>-/-</sup> mice. **(A)** Immunohistochemistry (IHC) showing rabbit IgG staining in place of AT2R primary antibody as a negative control staining. **(B)**, IHC showing expression of AT2R, NP-6A4 agonist, in the aortic tissue at day 28 of indicated mice (Scale bar = 50  $\mu$ m). **(C)**, Quantification of AT2R protein expression in aortic tissues relative to control. **(D-F)**, mRNA expression of mouse *Agtr1a* (AT1a), *Agtr1b* (AT1b) and *Agtr2* in aortic tissues from experimental *Apoe*<sup>-/-</sup> mice in the indicated groups as measured by qRT-PCR (n=4 mice in each group). The indicated values are relative to AngII expression level.

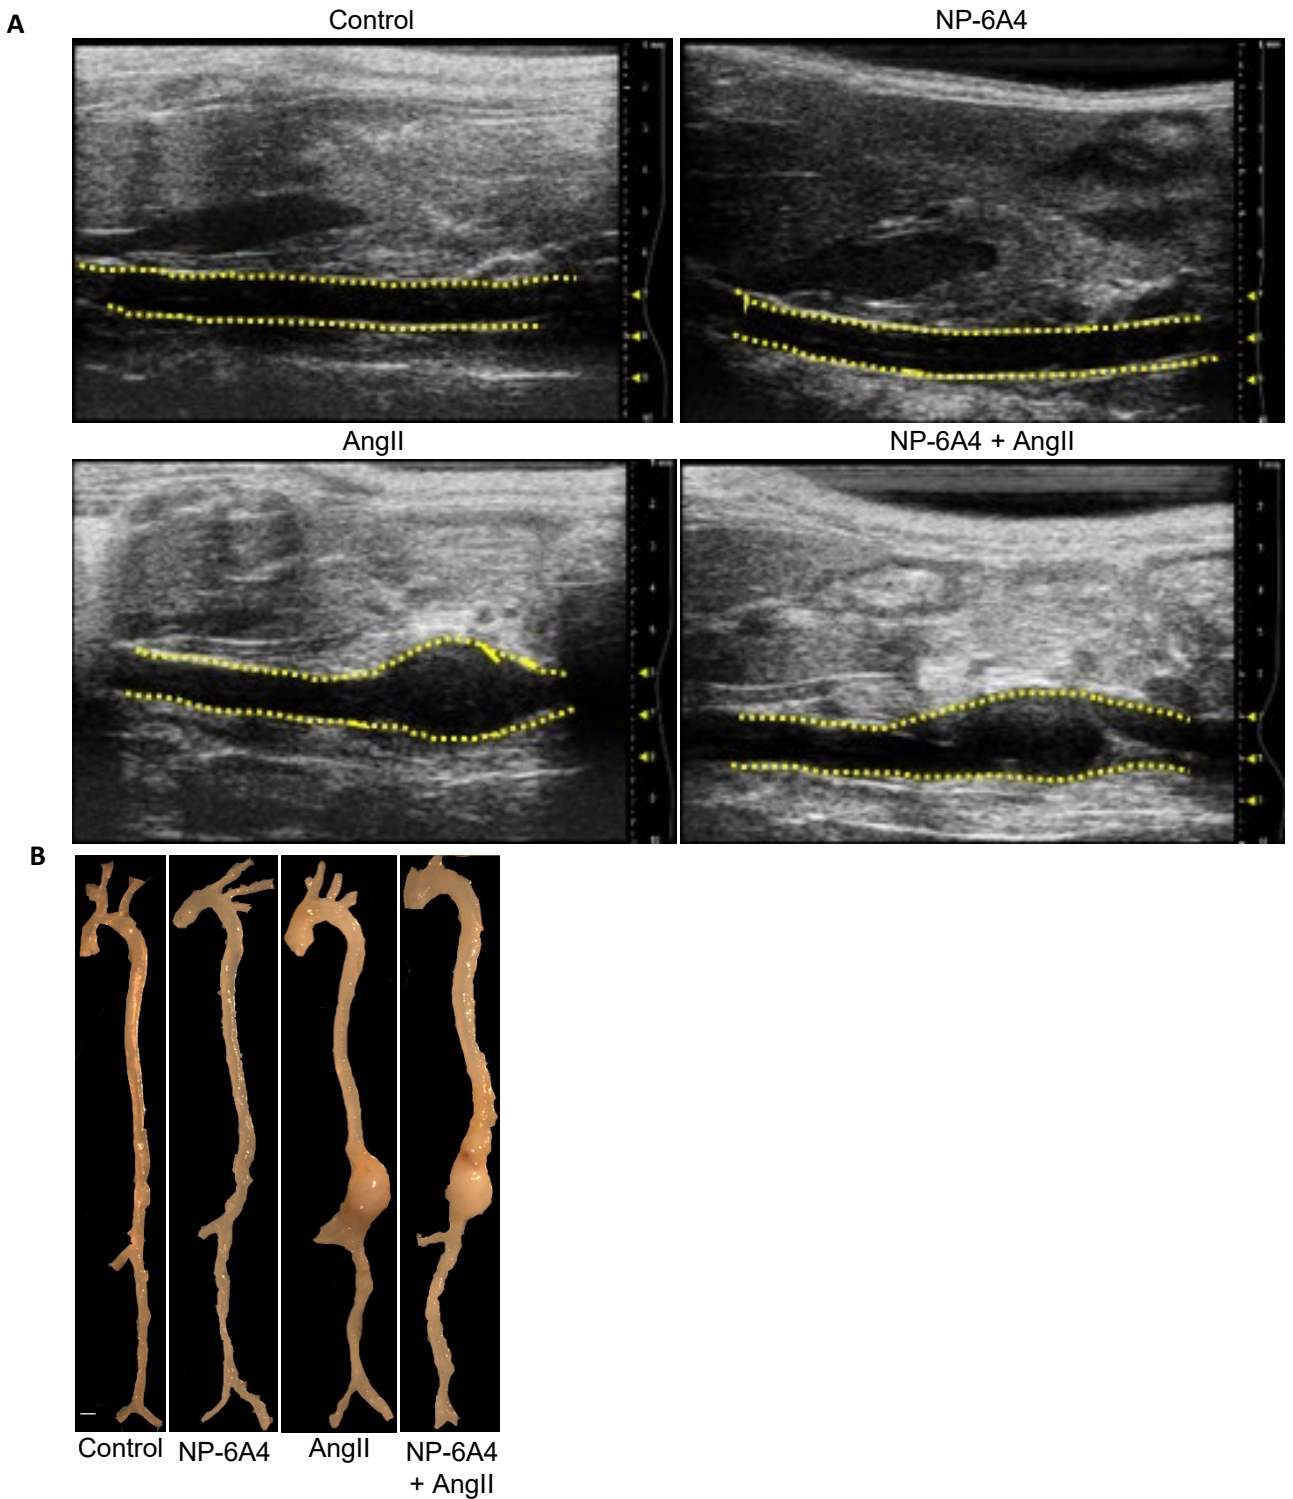

**Supplemental Figure 4.** (A), Representative transabdominal ultrasound images obtained at day 28 using a VisualSonics Vevo2100 showing an increase in the luminal expansion of abdominal aorta in *ApoE*<sup>-/-</sup> mice in response to AngII. (B), Representative aortae from experimental *ApoE*<sup>-/-</sup> mice showing maximal aortic width in the suprarenal region of the aorta. Images were taken using Zeiss Stemi 2000-C microscope. Yellow dotted lines outline the lumen of the aorta in A. Scale bar, 1mm.

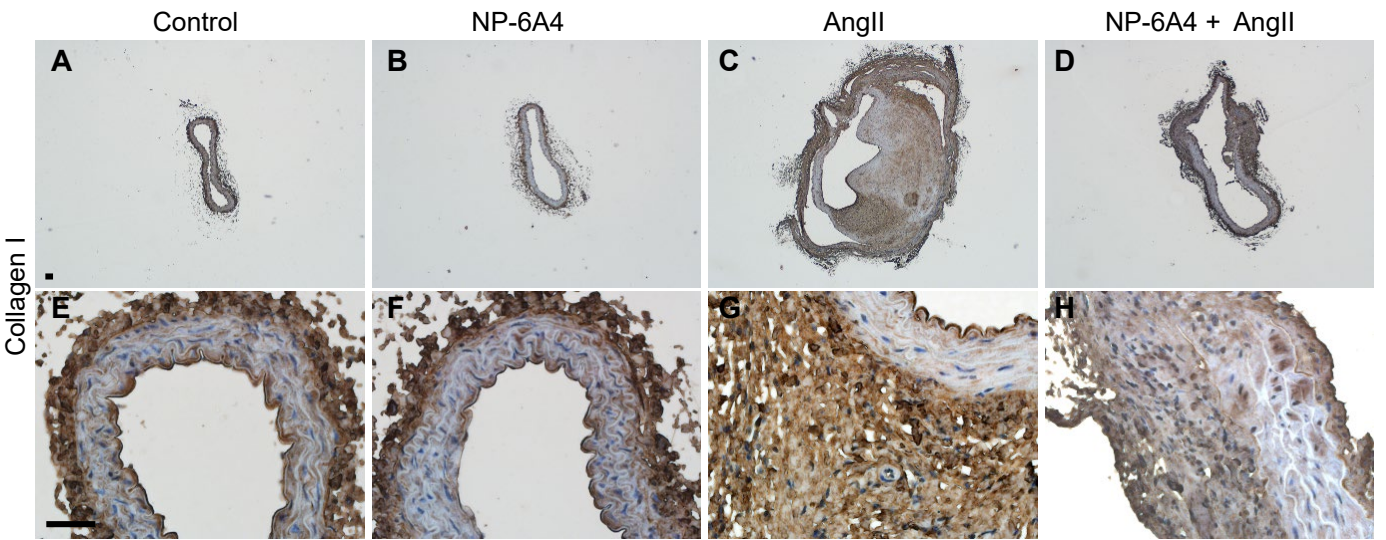

**Supplemental Figure 5.** (A - H), Representative IHC images showing expression of collagen I in the aortic tissue at day 28 of experimental *Apoe*<sup>-/-</sup> mice. 4 X and 40 X images are shown in A-D and E-H, respectively. Scale bar = 50  $\mu$ m.

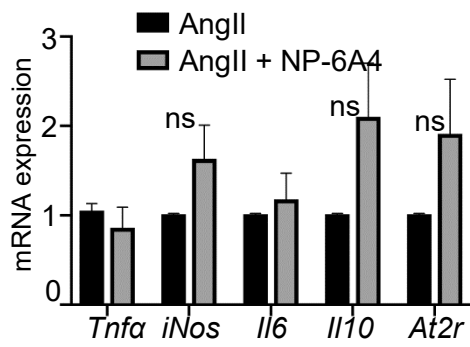

**Supplemental Figure 6.** mRNA expression of *Tnfa*, *iNos*, *Il6*, *Il10* and *Agtr2* in bone-marrow derived macrophages isolated from mice treated with either AngII alone or with AngII plus NP-6A4 treatments as measured by qRT-PCR. ns=non significant in paired two-tailed Student *t* test.
